# Supplementary material for: IL4 from T Follicular Helper Cells Downregulates Antitumor Immunity
Source: Oxford University Press journal article supplement (doi:10.1158/2326-6066.cir-16-0113), 2016-12-05
Supplement: 166656_1_supp_3713085_xfxx5q.docx [file 166656_1_supp_3713085_xfxx5q.docx]

**Supplement Figure Legends**

Supplement Figure 1. Increased IL-4 and IL-21 expression in tumor draining LNs.

Mice were treated as described in Fig. 1A. A) LNs removed for analysis. B) IL-4 mRNA expression levels on day 4. C) Tumor draining LNs were removed on the days indicated and analyzed for IL-4 production by ELIspot D) Tumor draining LNs were removed on the days indicated and analyzed for IL-21 mRNA expression levels. E) Mice were treated as described in Fig. 1D and IL-21 expression examined 7 days later. F) Mice were treated as described in Fig. 1F and analyzed for IL-21 mRNA levels. All results represent the mean + SD of results from 4-8 independent LNs. Experiments were repeated two - three times with similar results. *p< 0.01 when compared with naïve group.

Supplement Figure 2. GATA3 or FoxP3 expression in IL-4-produced cells.

FACS purified 4GET and CD4+, CD25+ cells were analyzed for mRNA expression. Naive CD4 T cells were isolated based on their expression of CD62+ and CD44-. Th2 cells were generated by stimulating with IL-4, anti-IFNg and anti-CD3/anti-CD28 Abs *in vitro* for 4 days. Results represent the mean + SD of results from 4-5 independent sorted cell populations. *p< 0.05 when compared with Th2 cells. **p< 0.01 when compared with CD4+, CD25+ cells.

Supplement Figure 3. Kinetics of surface marker expression by IL-4 producing cells from tumor draining LNs and surface marker in tumor infiltrated CD4 T cells.

(A) Tumor draining LNs were isolated from 4GET mice on the days indicated after tumor inoculation. The expression of eGFP and CD4 in CD3+ cells, or eGFP and CXCR5, PD-1 or ICOS in CD4+ cells was analyzed by flow cytometry. (B) Single cell suspensions were prepared from tumors and tumor draining LNs of mice challenged 25 days earlier as described in Fig 1. The expression of PD-1 and CXCR5 in both CD45 and CD4 gated cells was compared to cells from naïve LNs by flow cytometry. Experiments were repeated three times with similar results.
